# Supplementary material for: Flexibility index: a general descriptor of polarization ability in crystalline materials
Source: Royal Society of Chemistry journal article supplement (doi:10.1039/d4qi02749c), 2024-12-09
Supplement: d4qi02749c1.pdf [file d4qi02749c1.pdf]

## Supporting Information for

### **Flexibility index: a general descriptor of polarization ability in crystalline materials**

Qin Chen,<sup>a,c</sup> Xingxing Jiang,<sup>\*a</sup> Zheshuai Lin<sup>\*a,b,c</sup>

<sup>a</sup> Functional Crystals Lab, Technical Institute of Physics and Chemistry, Chinese Academy of Sciences, Beijing 100190, China.

<sup>b</sup> Center of Materials Science and Optoelectronics Engineering, University of the Chinese Academy of Sciences, Beijing 100049, China.

<sup>c</sup> University of the Chinese Academy of Sciences, Beijing 100049, China.

Corresponding Authors: E-mail: [xxjiang@mail.ipc.ac.cn](mailto:xxjiang@mail.ipc.ac.cn); [zslin@mail.ipc.ac.cn](mailto:zslin@mail.ipc.ac.cn).

**Table S1** Optical properties, flexibility and projected flexibility index in the unitary and binary diamond-like structure. For the wurtzite structures (space group:  $P6_3mc$ ), the listed refractive indices are the average of the values along the three crystallographic axes. The listed second-harmonic generation (SHG) coefficients are the maximum components in the second-order polarizability tensors ( $d_{14}$  for the zinc blende and  $d_{33}$  for wurtzite).

| System  | Material | Bandgap (eV)       | Refractive Index (@1 $\mu$ m) | Static Polarizability | Optical Polarizability | SHG Coefficient (pm/V) | Flexibility Index ( $F$ ) | Projected Flexibility Index ( $F_p$ ) |
|---------|----------|--------------------|-------------------------------|-----------------------|------------------------|------------------------|---------------------------|---------------------------------------|
| Unitary | C        | 5.48 <sup>1</sup>  | 2.32                          | 15.61                 | 15.61                  |                        | 0.15                      |                                       |
|         | Si       | 1.12 <sup>2</sup>  | 3.74                          | 177.09                | 177.09                 |                        | 0.34                      |                                       |
|         | Ge       | 0.66 <sup>3</sup>  | 5.20                          | 331.21                | 331.21                 |                        | 0.34                      |                                       |
|         | BeO      | 10.60 <sup>4</sup> | 1.64                          | 24.18                 | 6.85                   | 0.16                   | 0.08                      | 0.05                                  |
|         | BeS      | 5.50 <sup>5</sup>  | 2.16                          | 44.42                 | 29.64                  | 1.12                   | 0.14                      | 0.08                                  |
|         | BeSe     | 4.50 <sup>6</sup>  | 2.31                          | 55.27                 | 40.64                  | 1.55                   | 0.17                      | 0.10                                  |
|         | BeTe     | 2.70 <sup>6</sup>  | 2.76                          | 85.34                 | 74.81                  | 3.25                   | 0.21                      | 0.12                                  |
|         | CaSe     | 5.00 <sup>7</sup>  | 1.92                          | 83.43                 | 49.28                  | 5.25                   | 0.26                      | 0.15                                  |
|         | AlAs     | 2.22 <sup>8</sup>  | 3.15                          | 126.25                | 100.01                 | 23.26                  | 0.24                      | 0.14                                  |
|         | AlP      | 3.62 <sup>9</sup>  | 2.84                          | 114.47                | 86.96                  | 1.84                   | 0.25                      | 0.14                                  |
|         | BN       | 6.20 <sup>10</sup> | 2.04                          | 20.80                 | 11.81                  | 6.44                   | 0.12                      | 0.07                                  |
|         | BP       | 2.18 <sup>11</sup> | 2.96                          | 56.93                 | 56.35                  | 1.67                   | 0.22                      | 0.13                                  |
|         | BAs      | 3.34 <sup>12</sup> | 2.84                          | 54.46                 | 53.92                  | 10.62                  | 0.21                      | 0.12                                  |
|         | CdTe     | 1.50 <sup>13</sup> | 2.94                          | 183.76                | 136.73                 | 7.74                   | 0.25                      | 0.15                                  |
|         | GaP      | 2.44 <sup>12</sup> | 3.21                          | 150.13                | 128.49                 | 55.97                  | 0.26                      | 0.15                                  |
|         | InP      | 1.23 <sup>14</sup> | 3.53                          | 188.70                | 153.55                 | 36.00                  | 0.28                      | 0.16                                  |

|      |                    |      |        |        |       |      |      |
|------|--------------------|------|--------|--------|-------|------|------|
| MgS  | 4.50 <sup>15</sup> | 2.07 | 69.36  | 40.00  | 66.34 | 0.18 | 0.11 |
| MgSe | 3.60 <sup>15</sup> | 2.27 | 96.84  | 59.01  | 4.49  | 0.22 | 0.13 |
| MgTe | 3.49 <sup>16</sup> | 2.38 | 126.42 | 87.29  | 6.89  | 0.27 | 0.16 |
| ZnS  | 3.78 <sup>17</sup> | 2.32 | 77.92  | 55.57  | 11.17 | 0.18 | 0.10 |
| ZnSe | 2.82 <sup>17</sup> | 2.50 | 103.56 | 75.97  | 6.94  | 0.21 | 0.12 |
| ZnTe | 2.39 <sup>18</sup> | 2.84 | 216.02 | 161.86 | 13.37 | 0.26 | 0.15 |
| AgBr | 1.60 <sup>19</sup> | 2.18 | 106.97 | 58.57  | 14.29 | 0.14 | 0.08 |
| AlSb | 2.22 <sup>9</sup>  | 3.48 | 202.16 | 181.86 | 23.55 | 0.30 | 0.17 |
| AgI  | 2.80 <sup>20</sup> | 2.14 | 87.89  | 73.02  | 3.61  | 0.16 | 0.09 |
| CdS  | 2.50 <sup>9</sup>  | 2.31 | 103.54 | 68.86  | 2.02  | 0.21 | 0.12 |
| CuBr | 3.10 <sup>21</sup> | 2.08 | 39.35  | 37.43  | 32.07 | 0.14 | 0.08 |
| CuCl | 3.40 <sup>21</sup> | 1.97 | 33.43  | 30.39  | 6.85  | 0.11 | 0.06 |
| InN  | 0.90 <sup>14</sup> | 3.18 | 67.47  | 36.36  | 10.34 | 0.19 | 0.11 |
| AlN  | 5.34 <sup>22</sup> | 2.02 | 44.75  | 19.29  | 38.53 | 0.17 | 0.10 |
| GaN  | 3.32 <sup>23</sup> | 2.28 | 54.46  | 32.11  | 0.29  | 0.17 | 0.10 |
| ZnO  | 1.49 <sup>17</sup> | 2.40 | 64.69  | 32.24  | 2.03  | 0.12 | 0.07 |
| BSb  | 3.10 <sup>24</sup> | 2.91 | 70.83  | 65.56  | 9.91  | 0.27 | 0.16 |
| GeC  | 2.95 <sup>25</sup> | 2.70 | 70.79  | 45.87  | 7.88  | 0.20 | 0.12 |
| SnC  | 2.10 <sup>26</sup> | 2.74 | 90.79  | 57.81  | 54.03 | 0.25 | 0.14 |
| AlN  | 6.20 <sup>27</sup> | 1.94 | 23.00  | 9.69   | 30.87 | 0.17 | 0.08 |
| CdS  | 2.42 <sup>28</sup> | 2.35 | 49.77  | 32.77  | 5.31  | 0.21 | 0.11 |
| CdSe | 1.80 <sup>18</sup> | 2.60 | 60.95  | 42.41  | 9.18  | 0.23 | 0.11 |
| GaN  | 3.50 <sup>29</sup> | 2.36 | 28.02  | 16.71  | 3.43  | 0.17 | 0.09 |
| ZnO  | 3.40 <sup>17</sup> | 2.10 | 23.58  | 13.27  | 53.33 | 0.12 | 0.06 |
| BeTe | 2.70 <sup>30</sup> | 2.81 | 49.41  | 44.61  | 49.95 | 0.21 | 0.10 |

---

|      |                    |      |        |       |       |      |      |
|------|--------------------|------|--------|-------|-------|------|------|
| BeO  | 7.80 <sup>4</sup>  | 1.74 | 12.90  | 4.10  | 13.50 | 0.08 | 0.04 |
| BN   | 8.79 <sup>10</sup> | 1.96 | 9.77   | 5.40  | 1.26  | 0.12 | 0.06 |
| AgI  | 2.40 <sup>20</sup> | 2.22 | 48.30  | 36.77 | 2.35  | 0.16 | 0.08 |
| AlSb | 1.67 <sup>9</sup>  | 3.56 | 91.06  | 80.79 | 3.71  | 0.30 | 0.15 |
| AlAs | 2.05 <sup>8</sup>  | 3.29 | 79.25  | 66.51 | 0.95  | 0.24 | 0.12 |
| BAs  | 3.34 <sup>12</sup> | 2.80 | 29.02  | 28.73 | 28.83 | 0.21 | 0.10 |
| AlP  | 3.26 <sup>9</sup>  | 2.77 | 63.11  | 49.40 | 13.93 | 0.24 | 0.12 |
| CuCl | 3.10 <sup>31</sup> | 2.04 | 18.65  | 16.09 | 5.46  | 0.11 | 0.06 |
| CdTe | 1.48 <sup>32</sup> | 2.98 | 81.08  | 60.79 | 11.24 | 0.25 | 0.13 |
| GaAs | 1.46 <sup>33</sup> | 3.63 | 91.83  | 82.30 | 33.05 | 0.26 | 0.13 |
| CuI  | 2.85 <sup>34</sup> | 2.30 | 29.23  | 28.78 | 3.29  | 0.14 | 0.07 |
| MgO  | 6.40 <sup>35</sup> | 1.67 | 13.96  | 6.15  | 12.82 | 0.12 | 0.05 |
| ZnTe | 2.67 <sup>18</sup> | 2.78 | 71.09  | 58.72 | 7.56  | 0.26 | 0.13 |
| ZnSe | 2.87 <sup>18</sup> | 2.53 | 54.79  | 40.30 | 0.14  | 0.21 | 0.11 |
| MgSe | 3.60 <sup>15</sup> | 2.58 | 46.06  | 27.72 | 4.42  | 0.22 | 0.11 |
| MgTe | 3.49 <sup>16</sup> | 2.54 | 59.99  | 40.96 | 6.38  | 0.24 | 0.12 |
| InP  | 2.01 <sup>14</sup> | 3.07 | 71.58  | 54.77 | 5.74  | 0.28 | 0.14 |
| MgS  | 4.50 <sup>15</sup> | 2.64 | 36.53  | 20.70 | 40.06 | 0.18 | 0.09 |
| ZnS  | 3.91 <sup>17</sup> | 2.34 | 41.76  | 29.58 | 0.02  | 0.18 | 0.09 |
| BP   | 2.18 <sup>36</sup> | 2.93 | 30.67  | 30.35 | 11.14 | 0.22 | 0.11 |
| GaP  | 2.26 <sup>37</sup> | 3.17 | 91.05  | 77.37 | 1.29  | 0.26 | 0.13 |
| BaO  | 4.80 <sup>35</sup> | 1.80 | 100.09 | 14.53 | 13.40 | 0.20 | 0.07 |
| CdO  | 2.28 <sup>38</sup> | 2.19 | 30.64  | 16.48 | 5.92  | 0.14 | 0.06 |
| InN  | 1.94 <sup>39</sup> | 2.37 | 32.57  | 17.04 | 0.58  | 0.24 | 0.11 |
| LiBr | 7.60 <sup>40</sup> | 1.62 | 30.07  | 10.92 | 0.34  | 0.11 | 0.06 |

---

---

|      |                    |      |       |       |       |      |      |
|------|--------------------|------|-------|-------|-------|------|------|
| LiCl | 9.40 <sup>40</sup> | 1.52 | 24.11 | 7.43  | 1.37  | 0.12 | 0.06 |
| LiI  | 6.40 <sup>41</sup> | 1.79 | 41.88 | 19.03 | 30.26 | 0.12 | 0.06 |
| SiC  | 3.26 <sup>42</sup> | 2.60 | 31.44 | 19.63 | 4.53  | 0.22 | 0.11 |

---

## References

1. L. Cheng, S. Zhu, X. Ouyang and W. Zheng, Bandgap evolution of diamond, *Diamond & Relat. Mater.*, 2023, 132, 109638
2. S. Ahmed, A. Ansari, M. A. Siddiqui, A. Khan and P. Ranjan, A potential optical sensor based on nanostructured silicon, *J. Mater. Sci.: Mater. in Electron.*, 2023, 34, 755
3. L.-D. Yuan, S.-S. Li and J.-W. Luo, Direct bandgap emission from strain-doped germanium, *Nat. Commun.*, 2024, 15, 618
4. K. J. Chang, S. Froyen and M. Cohen, The electronic band structures for zincblende and wurtzite BeO, *J. Phys. C: Solid State Phys.*, 1983, 16, 3475
5. F. Li, Z. Zhang, H. Liu, W. Zhu, T. Wang, M. Park, J. Zhang, N. Bönninghoff, X. Feng, H. Zhang, J. Luan, J. Wang, X. Liu, T. Chang, J. P. Chu, Y. Lu, Y. Liu, P. Guan and Y. Yang, Oxidation-induced superelasticity in metallic glass nanotubes, *Nat. Mater.*, 2023, 1–6
6. W. M. Yim, J. P. Dismukes, E. J. Stofko and R. J. Paff, Synthesis and some properties of BeTe, BeSe and BeS, *J. Phys. Chem. Solids*, 1972, 33, 501–505
7. R. Pandey, P. Lepak and J. E. Jaffe, Electronic structure of alkaline-earth selenides, *Phys. Rev. B*, 1992, 46, 4976–4977
8. X. Li, X. Tao, R. Li, H. Chen, Y. Ouyang and Y. Du, Lattice dynamics properties of XAs (X=Al, Ga and In) with zincblende structure from first-principle calculations, *J. Phys. Chem. Solids*, 2012, 73, 1034–1039
9. S. Zh. Karazhanov, Ab initio Studies of the Band Parameters of III–V and II–VI Zinc-Blende Semiconductors, *Semicond.*, 2005, 39, 161
10. V. I. Gavrilenko and R. Q. Wu, Linear and nonlinear optical properties of group-III nitrides, *Phys. Rev. B*, 2000, 61, 2632–2642
11. J. D. Ng and A. Danner, Pseudopotential form factors and electronic band structures for AlAs, AlP, BaS, BP, 3C-SiC, and cubic-GaN, *Phys. Scr.*, 2021, 96, 055801
12. S. Q. Wang and H. Q. Ye, Plane-wave pseudopotential study on mechanical and electronic properties for IV and III-V crystalline phases with zinc-blende structure, *Phys. Rev. B*, 2002, 66, 235111
13. B. G. Valmik, M. P. Deshpande, S. V. Bhatt, V. Sathe, H. R. Bhoi, P. Rajput and S. H. Chaki, Investigation and fabrication of Cadmium Telluride (CdTe) single crystal as a photodetector, *Phys. B: Condens. Matter*, 2021, 614, 413027
14. I. Vurgaftman, J. R. Meyer and L. R. Ram-Mohan, Band parameters for III–V compound semiconductors and their alloys, *J. Appl. Phys.*, 2001, 89, 5815–5875
15. H. Okuyama, K. Nakano, T. M. T. Miyajima and K. A. K. Akimoto, Epitaxial Growth of ZnMgSSe on GaAs Substrate by Molecular Beam Epitaxy, *Jpn. J. Appl. Phys.*, 1991, 30, L1620
16. F. E. H. Hassan and B. Amrani, Structural, electronic and thermodynamic properties of magnesium chalcogenide ternary alloys, *J. Phys.: Condens. Matter*, 2007, 19, 386234
17. M. Oshikiri and F. Aryasetiawan, Band gaps and quasiparticle energy calculations on ZnO, ZnS, and ZnSe in the zinc-blende structure by the GW approximation, *Phys. Rev. B*, 1999, 60, 10754–10757
18. O. Zakharov, A. Rubio, X. Blase, M. L. Cohen and S. G. Louie, Quasiparticle band structures of six II-VI compounds: ZnS, ZnSe, ZnTe, CdS, CdSe, and CdTe, *Phys. Rev. B*, 1994, 50, 10780–10787
19. A. B. Kunz, Electronic structure of AgF, AgCl, and AgBr, *Phys. Rev. B*, 1982, 26, 2070–2075
20. R. H. Victora, Calculated electronic structure of silver halide crystals, *Phys. Rev. B*, 1997, 56, 4417–4421

21. Electronic structure of the copper halides CuCl, CuBr and CuI, *Mater. Sci. & Eng.: B*, 1996, 39, 95–100
22. A. Ferreira da Silva, N. Souza Dantas, J. S. de Almeida, R. Ahuja and C. Persson, Electronic and optical properties of wurtzite and zinc-blende TiN and AlN, *J. Cryst. Growth*, 2005, 281, 151–160
23. P. Carrier and S.-H. Wei, Theoretical study of the band-gap anomaly of InN, *J. Appl. Phys.*, 2005, 97, 033707
24. I. Mal and D. P. Samajdar, Origin of direct and indirect bandgap in B-X(X = Sb, Bi): A first principle study, *Mater. Today*, 2021, 46, 5870–5873
25. K. Bashir, M. Bilal, B. Amin, Y. Chen and M. Idrees, Structural, electronic and thermoelectric properties of GeC and MXO (M = Ti, Zr and X = S, Se) monolayers and their van der Waals heterostructures, *RSC Adv.*, 2023, 13, 9624–9635
26. S. Majidi, A. Achour, D. P. Rai, P. Nayebi, S. Solaymani, N. Beryani Nezafat and S. M. Elahi, Effect of point defects on the electronic density states of SnC nanosheets: First-principles calculations, *Res. in Phys.*, 2017, 7, 3209–3215
27. W. M. Yim, E. J. Stofko, P. J. Zanzucchi, J. I. Pankove, M. Ettenberg and S. L. Gilbert, Epitaxially grown AlN and its optical band gap, *J. Appl. Phys.*, 1973, 44, 292–296
28. X.-D. Liu and T. Xing, First-principles calculations of electronic structures and optical properties of group-IIIa elements doped wurtzite CdS, *Solid State Commun.*, 2014, 187, 72–76
29. H. Qin, X. Luan, C. Feng, D. Yang and G. Zhang, Mechanical, Thermodynamic and Electronic Properties of Wurtzite and Zinc-Blende GaN Crystals, *Materials*, 2017, 10, 1419
30. L. Guo, G. Hu, S. Zhang, W. Feng and Z. Zhang, Structural, elastic, electronic and optical properties of beryllium chalcogenides BeX (X = S, Se, Te) with zinc-blende structure, *J. Alloys & Compd.*, 2013, 561, 16–22
31. H. Ullah, A. Reshak, K. Inayat, R. Ali, G. Murtaza, S. At, H. U. Din, Z. Alahmed and S. Khan, Structural, elastic, optoelectronic and optical properties of CuX (X = F, Cl, Br, I): A DFT study, *Journal of Optoelectronics and Adv. Mater.*, 2014, 16, 11–12
32. T. Sadowski and R. Ramprasad, First principles computational study of wurtzite CdTe nanowires, *J. Mater. Sci.*, 2010, 45, 5463–5467
33. P. Kusch, S. Breuer, M. Ramsteiner, L. Geelhaar, H. Riechert and S. Reich, Band gap of wurtzite GaAs: A resonant Raman study, *Phys. Rev. B*, 2012, 86, 075317
34. A. C. Demirok, H. Sahin and M. Yagmurcukardes, Ultra-thin double-layered hexagonal CuI: strain tunable properties and robust semiconducting behavior, *J. Phys.: Condens. Matter*, 2024, 36, 215401
35. X. Yang, Y. Wang, H. Yan and Y. Chen, Effects of epitaxial strains on spontaneous polarizations and band gaps of alkaline-earth-metal oxides MO (M = Mg, Ca, Sr, Ba), *Comput. Mater. Sci.*, 2016, 121, 61–66
36. P. Popper and T. A. Ingles, Boron Phosphide, a III–V Compound of Zinc-Blende Structure, *Nature*, 1957, 179, 1075–1075
37. H. Cao, P. Lu, X. Zhang, Z. Yu, L. Han, J. Chen and S. Wang, Structural and electronic properties of wurtzite GaX (X = N, P, As, Sb, Bi) under in-plane biaxial strains, *Superlattices and Microstruct.*, 2014, 67, 25–32
38. A. Schleife, F. Fuchs, J. Furthmüller and F. Bechstedt, First-principles study of ground- and excited-state properties of MgO, ZnO, and CdO polymorphs, *Phys. Rev. B*, 2006, 73, 245212
39. K. Osamura, K. Nakajima, Y. Murakami, P. H. Shingu and A. Ohtsuki, Fundamental absorption edge in GaN, InN and their alloys, *Solid State Commun.*, 1972, 11, 617–621
40. C. R. Gopikrishnan, D. Jose and A. Datta, Electronic structure, lattice energies and Born exponents for alkali halides from first principles, *AIP Adv.*, 2012, 2, 012131
41. Z. Zhang, M. Li, K. Chen, Q. Zhao, M. Huang and X. Ouyang, Effects of irradiation defects on the electronic

structure and optical properties of LiI scintillator, *Opt. Mater.*, 2021, 112, 110727

42. J. B. Casady and R. W. Johnson, Status of silicon carbide (SiC) as a wide-bandgap semiconductor for high-temperature applications: a review, *Solid State Electron.*, 1996, 39, 1409–1422
